# Supplementary material for: Depth Influences Symbiodiniaceae Associations Among Montastraea cavernosa Corals on the Belize Barrier Reef
Source: PubMed Central journal article supplement (PMC7160519; doi:10.3389/fmicb.2020.00518), 2020-04-09
Supplement: Data_Sheet_1.pdf [file Data_Sheet_1.pdf]

# Depth Influences Symbiodiniaceae Associations Among *Montastraea cavernosa* Corals on the Belize Barrier Reef

Ryan J. Eckert\*, Ashley M. Reaume†, Alexis B. Sturm, Michael S. Studivan† and Joshua D. Voss\*

Harbor Branch Oceanographic Institute, Florida Atlantic University, Boca Raton, FL, United States

\*Correspondence: Ryan J. Eckert [ryan.j.eckert@gmail.com](mailto:ryan.j.eckert@gmail.com); Joshua D. Voss [jvoss2@fau.edu](mailto:jvoss2@fau.edu)

†Present address: Ashley M. Reaume, Department of Biological Sciences, University of Central Florida, Orlando, FL, United States

Michael S. Studivan, Cooperative Institute for Marine and Atmospheric Studies, Rosenstiel School of Marine and Atmospheric Science, University of Miami, Coral Gables, FL, United States

## Supplementary Materials

**Supplementary Table S1.** Oligonucleotide sequences used for *ITS2* typing Symbiodiniaceae communities. Unique indices in barcoding primers are bolded in the sequence and listed under “Index”.

| Name         | Sequence (5'–3')                                           | Index  | Use          |
|--------------|------------------------------------------------------------|--------|--------------|
| ITS2-F-miseq | TCGTCGGCAGCGTCAGATGTGTATAAGAGACAGGTGAATTGCAGAACTCCGTG      | n/a    | ITS2 PCR     |
| ITS2-R-miseq | GTCTCGTGGGCTCGGAGATGTGTATAAGAGACAGCCTCCGCTTACTTATATGCTT    | n/a    | ITS2 PCR     |
| Hyb_F1_i5    | AATGATACGGCGACCACCGAGATCTACAC <b>ATCACG</b> TCGTCGGCAGCGTC | ATCACG | Indexing PCR |
| Hyb_F2_i5    | AATGATACGGCGACCACCGAGATCTACAC <b>CGATGT</b> TCGTCGGCAGCGTC | CGATGT | Indexing PCR |
| Hyb_F3_i5    | AATGATACGGCGACCACCGAGATCTACAC <b>TTAGGC</b> TCGTCGGCAGCGTC | TTAGGC | Indexing PCR |
| Hyb_F4_i5    | AATGATACGGCGACCACCGAGATCTACAC <b>TGACCA</b> TCGTCGGCAGCGTC | TGACCA | Indexing PCR |
| Hyb_F5_i5    | AATGATACGGCGACCACCGAGATCTACAC <b>ACAGTG</b> TCGTCGGCAGCGTC | ACAGTG | Indexing PCR |
| Hyb_F6_i5    | AATGATACGGCGACCACCGAGATCTACAC <b>GCCAAT</b> TCGTCGGCAGCGTC | GCCAAT | Indexing PCR |
| Hyb_F7_i5    | AATGATACGGCGACCACCGAGATCTACAC <b>CAGATC</b> TCGTCGGCAGCGTC | CAGATC | Indexing PCR |
| Hyb_F8_i5    | AATGATACGGCGACCACCGAGATCTACAC <b>ACTTGA</b> TCGTCGGCAGCGTC | ACTTGA | Indexing PCR |
| Hyb_F9_i5    | AATGATACGGCGACCACCGAGATCTACAC <b>GATCAG</b> TCGTCGGCAGCGTC | GATCAG | Indexing PCR |
| Hyb_R1_i7    | CAAGCAGAAGACGGCATAACGAGAT <b>GGCTAC</b> GTCTCGTGGGCTCGG    | GGCTAC | Indexing PCR |
| Hyb_R2_i7    | CAAGCAGAAGACGGCATAACGAGAT <b>CTTGTA</b> GTCTCGTGGGCTCGG    | CTTGTA | Indexing PCR |
| Hyb_R3_i7    | CAAGCAGAAGACGGCATAACGAGAT <b>AGTCAA</b> GTCTCGTGGGCTCGG    | AGTCAA | Indexing PCR |
| Hyb_R4_i7    | CAAGCAGAAGACGGCATAACGAGAT <b>AGTTCC</b> GTCTCGTGGGCTCGG    | AGTTCC | Indexing PCR |

|            |                                                         |        |              |
|------------|---------------------------------------------------------|--------|--------------|
| Hyb_R5_i7  | CAAGCAGAAGACGGCATAACGAGAT <b>ATGTCA</b> GTCTCGTGGGCTCGG | ATGTCA | Indexing PCR |
| Hyb_R6_i7  | CAAGCAGAAGACGGCATAACGAGAT <b>CCGTCC</b> GTCTCGTGGGCTCGG | CCGTCC | Indexing PCR |
| Hyb_R7_i7  | CAAGCAGAAGACGGCATAACGAGAT <b>GTAGAG</b> GTCTCGTGGGCTCGG | GTAGAG | Indexing PCR |
| Hyb_R8_i7  | CAAGCAGAAGACGGCATAACGAGAT <b>GTCCGC</b> GTCTCGTGGGCTCGG | GTCCGC | Indexing PCR |
| Hyb_R9_i7  | CAAGCAGAAGACGGCATAACGAGAT <b>GTGAAA</b> GTCTCGTGGGCTCGG | GTGAAA | Indexing PCR |
| Hyb_R10_i7 | CAAGCAGAAGACGGCATAACGAGAT <b>GTGGCC</b> GTCTCGTGGGCTCGG | GTGGCC | Indexing PCR |
| III_Lib1   | AATGATACGGCGACCACCGA                                    | n/a    | qPCR         |
| III_Lib2   | CAAGCAGAAGACGGCATAACGA                                  | n/a    | qPCR         |

**Supplementary Table S2.** *Montastraea cavernosa* Symbiodiniaceae *ITS2* sequencing information. Site = sampling site (Fig 1.1); Depth zone = depth zone colony from which colony was sampled (Fig 1.2); *ITS2* PCR cycles = number of PCR cycles to amplify Symbiodiniaceae *ITS2*; Sequencing pool = random sequencing pool assignment; i5 index = forward index; i7 index = reverse complement of reverse index.

| Sample ID    | Sampling date | Site | Depth zone (m) | <i>ITS2</i> PCR cycles | Sequencing pool | i5 Index | i7 Index |
|--------------|---------------|------|----------------|------------------------|-----------------|----------|----------|
| CBC_MCAV_001 | 03/23/17      | RW   | 25             | 24                     | 3               | CAGATC   | GCGGAC   |
| CBC_MCAV_002 | 03/23/17      | RW   | 25             | 24                     | 1               | CGATGT   | GGAAC    |
| CBC_MCAV_003 | 03/23/17      | RW   | 25             | 24                     | 2               | ACTTGA   | TTTCAC   |
| CBC_MCAV_004 | 03/23/17      | RW   | 25             | 24                     | 1               | CGATGT   | TTGACT   |
| CBC_MCAV_005 | 03/23/17      | RW   | 25             | 22                     | 1               | ACAGTG   | GCGGAC   |
| CBC_MCAV_006 | 03/23/17      | RW   | 25             | 24                     | 3               | ACAGTG   | GTAGCC   |
| CBC_MCAV_007 | 03/23/17      | RW   | 25             | 24                     | 2               | TTAGGC   | GCGGAC   |
| CBC_MCAV_008 | 03/23/17      | RW   | 25             | 24                     | 3               | ACTTGA   | GGCCAC   |
| CBC_MCAV_009 | 03/23/17      | RW   | 25             | 24                     | 2               | ACAGTG   | GGACGG   |
| CBC_MCAV_010 | 03/23/17      | RW   | 25             | 24                     | 1               | ATCACG   | CTCTAC   |
| CBC_MCAV_011 | 03/23/17      | RW   | 25             | 28                     | 2               | CGATGT   | TGACAT   |
| CBC_MCAV_012 | 03/23/17      | RW   | 25             | 28                     | 3               | ACAGTG   | CTCTAC   |
| CBC_MCAV_013 | 03/23/17      | RW   | 25             | 28                     | 2               | ACAGTG   | TTTCAC   |

|              |          |    |    |    |   |        |        |
|--------------|----------|----|----|----|---|--------|--------|
| CBC_MCAV_014 | 03/23/17 | RW | 25 | 24 | 1 | TGACCA | GTAGCC |
| CBC_MCAV_015 | 03/23/17 | RW | 25 | 22 | 3 | CGATGT | TGACAT |
| CBC_MCAV_016 | 03/23/17 | RW | 25 | 24 | 2 | CAGATC | TACAAG |
| CBC_MCAV_017 | 03/23/17 | RW | 16 | 28 | 1 | TGACCA | CTCTAC |
| CBC_MCAV_018 | 03/23/17 | RW | 16 | 24 | 3 | ATCACG | GTAGCC |
| CBC_MCAV_019 | 03/23/17 | RW | 16 | 24 | 2 | CGATGT | GCGGAC |
| CBC_MCAV_020 | 03/23/17 | RW | 16 | 28 | 3 | ATCACG | CTCTAC |
| CBC_MCAV_021 | 03/23/17 | RW | 16 | 28 | 1 | ACTTGA | TGACAT |
| CBC_MCAV_022 | 03/23/17 | RW | 16 | 26 | 3 | CAGATC | TTTCAC |
| CBC_MCAV_023 | 03/23/17 | RW | 16 | 22 | 3 | ACAGTG | TTGACT |
| CBC_MCAV_024 | 03/23/17 | RW | 16 | 22 | 3 | CGATGT | GGCCAC |
| CBC_MCAV_025 | 03/23/17 | RW | 16 | 26 | 3 | CGATGT | TTGACT |
| CBC_MCAV_026 | 03/23/17 | RW | 16 | 24 | 1 | CGATGT | TACAAG |
| CBC_MCAV_027 | 03/23/17 | RW | 16 | 24 | 1 | ACAGTG | CTCTAC |
| CBC_MCAV_028 | 03/23/17 | RW | 16 | 22 | 3 | GCCAAT | GGAACT |
| CBC_MCAV_029 | 03/23/17 | RW | 10 | 22 | 1 | CAGATC | TTGACT |
| CBC_MCAV_030 | 03/23/17 | RW | 10 | 24 | 1 | ATCACG | GTAGCC |
| CBC_MCAV_031 | 03/23/17 | RW | 10 | 24 | 1 | TTAGGC | GTAGCC |
| CBC_MCAV_032 | 03/23/17 | RW | 10 | 28 | 1 | GCCAAT | GCGGAC |
| CBC_MCAV_033 | 03/23/17 | RW | 10 | 28 | 1 | GCCAAT | CTCTAC |
| CBC_MCAV_034 | 03/23/17 | RW | 10 | 28 | 2 | CGATGT | GGACGG |
| CBC_MCAV_035 | 03/23/17 | RW | 10 | 22 | 3 | TGACCA | TGACAT |
| CBC_MCAV_036 | 03/23/17 | RW | 10 | 23 | 2 | GCCAAT | TACAAG |
| CBC_MCAV_037 | 03/23/17 | RW | 10 | 22 | 3 | ACTTGA | TACAAG |
| CBC_MCAV_038 | 03/23/17 | RW | 10 | 23 | 3 | CGATGT | TTTCAC |
| CBC_MCAV_039 | 03/23/17 | RW | 10 | 22 | 2 | CGATGT | TTTCAC |
| CBC_MCAV_040 | 03/23/17 | RW | 10 | 23 | 2 | TGACCA | TTTCAC |
| CBC_MCAV_041 | 03/23/17 | RW | 10 | 23 | 3 | ACAGTG | TACAAG |
| CBC_MCAV_042 | 03/23/17 | RW | 10 | 22 | 3 | ACTTGA | GGAACT |

|              |          |    |    |    |   |        |        |
|--------------|----------|----|----|----|---|--------|--------|
| CBC_MCAV_043 | 03/23/17 | RW | 10 | 22 | 2 | ATCACG | CTCTAC |
| CBC_MCAV_044 | 03/23/17 | RW | 16 | 23 | 1 | TTAGGC | TTTCAC |
| CBC_MCAV_045 | 03/23/17 | RW | 16 | 22 | 3 | ACTTGA | GCGGAC |
| CBC_MCAV_046 | 03/23/17 | RW | 16 | 22 | 3 | CAGATC | GTAGCC |
| CBC_MCAV_047 | 03/24/17 | SR | 16 | 22 | 1 | TGACCA | GGCCAC |
| CBC_MCAV_048 | 03/24/17 | SR | 16 | 22 | 3 | GCCAAT | TGACAT |
| CBC_MCAV_049 | 03/24/17 | SR | 16 | 23 | 2 | CAGATC | TTGACT |
| CBC_MCAV_050 | 03/24/17 | SR | 16 | 22 | 1 | GCCAAT | GGAACT |
| CBC_MCAV_051 | 03/24/17 | SR | 16 | 22 | 3 | GCCAAT | TTTCAC |
| CBC_MCAV_052 | 03/24/17 | SR | 16 | 26 | 1 | ATCACG | GCGGAC |
| CBC_MCAV_053 | 03/24/17 | SR | 16 | 23 | 2 | CGATGT | GTAGCC |
| CBC_MCAV_054 | 03/24/17 | SR | 16 | 24 | 1 | GCCAAT | TTGACT |
| CBC_MCAV_055 | 03/24/17 | SR | 16 | 22 | 1 | TTAGGC | GGCCAC |
| CBC_MCAV_056 | 03/24/17 | SR | 16 | 22 | 2 | GCCAAT | GCGGAC |
| CBC_MCAV_057 | 03/24/17 | SR | 16 | 22 | 3 | GCCAAT | TTGACT |
| CBC_MCAV_058 | 03/24/17 | SR | 16 | 23 | 1 | ACAGTG | GTAGCC |
| CBC_MCAV_059 | 03/24/17 | SR | 16 | 22 | 2 | GCCAAT | GGACGG |
| CBC_MCAV_060 | 03/24/17 | SR | 16 | 23 | 1 | ACTTGA | GGACGG |
| CBC_MCAV_061 | 03/24/17 | SR | 25 | 22 | 2 | TGACCA | GCGGAC |
| CBC_MCAV_062 | 03/24/17 | SR | 25 | 28 | 2 | ATCACG | TTTCAC |
| CBC_MCAV_063 | 03/24/17 | SR | 25 | 22 | 1 | ACAGTG | TGACAT |
| CBC_MCAV_064 | 03/24/17 | SR | 25 | 23 | 2 | CGATGT | GGCCAC |
| CBC_MCAV_065 | 03/24/17 | SR | 25 | 23 | 1 | CGATGT | TGACAT |
| CBC_MCAV_066 | 03/24/17 | SR | 25 | 22 | 1 | TGACCA | TGACAT |
| CBC_MCAV_067 | 03/24/17 | SR | 25 | 24 | 3 | CAGATC | CTCTAC |
| CBC_MCAV_068 | 03/24/17 | SR | 25 | 24 | 1 | GCCAAT | TTTCAC |
| CBC_MCAV_069 | 03/24/17 | SR | 25 | 22 | 2 | ATCACG | GCGGAC |
| CBC_MCAV_070 | 03/24/17 | SR | 25 | 24 | 2 | GCCAAT | CTCTAC |
| CBC_MCAV_071 | 03/24/17 | SR | 25 | 24 | 1 | GCCAAT | TACAAG |

|              |          |    |    |    |   |        |         |
|--------------|----------|----|----|----|---|--------|---------|
| CBC_MCAV_072 | 03/24/17 | SR | 25 | 24 | 3 | CGATGT | GGACGG  |
| CBC_MCAV_073 | 03/24/17 | SR | 25 | 24 | 2 | ATCACG | TACAAG  |
| CBC_MCAV_074 | 03/24/17 | SR | 25 | 24 | 2 | TTAGGC | GTAGCC  |
| CBC_MCAV_075 | 03/24/17 | SR | 25 | 23 | 2 | CAGATC | GGCCAC  |
| CBC_MCAV_076 | 03/24/17 | SR | 10 | 23 | 2 | ATCACG | TGACAT  |
| CBC_MCAV_077 | 03/24/17 | SR | 10 | 22 | 3 | TTAGGC | TTTCAC  |
| CBC_MCAV_078 | 03/24/17 | SR | 10 | 23 | 1 | ATCACG | TTTCAC  |
| CBC_MCAV_079 | 03/24/17 | SR | 10 | 23 | 2 | ACTTGA | GGACGG  |
| CBC_MCAV_080 | 03/24/17 | SR | 10 | 24 | 1 | TGACCA | TTGACT  |
| CBC_MCAV_081 | 03/24/17 | SR | 10 | 22 | 1 | ACTTGA | GGCCAC  |
| CBC_MCAV_082 | 03/24/17 | SR | 10 | 22 | 2 | TTAGGC | GGCCAC  |
| CBC_MCAV_083 | 03/24/17 | SR | 10 | 22 | 3 | TGACCA | CTCTAC  |
| CBC_MCAV_084 | 03/24/17 | SR | 10 | 22 | 2 | ACAGTG | TGACAT  |
| CBC_MCAV_085 | 03/24/17 | SR | 10 | 22 | 1 | TTAGGC | CTCTAC  |
| CBC_MCAV_086 | 03/24/17 | SR | 10 | 22 | 1 | TGACCA | GGACGG  |
| CBC_MCAV_087 | 03/24/17 | SR | 10 | 22 | 3 | ATCACG | GCGGAC  |
| CBC_MCAV_088 | 03/24/17 | SR | 10 | 22 | 2 | CAGATC | GGACGG  |
| CBC_MCAV_089 | 03/24/17 | SR | 10 | 24 | 2 | CAGATC | TGACAT  |
| CBC_MCAV_090 | 03/24/17 | SR | 10 | 23 | 1 | ACAGTG | GGCCAC  |
| CBC_MCAV_091 | 03/24/17 | SR | 10 | 24 | 3 | TGACCA | GCGGAC  |
| CBC_MCAV_092 | 03/24/17 | SR | 16 | 23 | 2 | ACTTGA | TGACAT  |
| CBC_MCAV_093 | 03/24/17 | TR | 16 | 26 | 2 | TGACCA | CTCTAC  |
| CBC_MCAV_094 | 03/24/17 | TR | 16 | 22 | 3 | CGATGT | GTAGCC  |
| CBC_MCAV_095 | 03/24/17 | TR | 16 | 22 | 2 | GCCAAT | TGACAT  |
| CBC_MCAV_096 | 03/24/17 | TR | 16 | 23 | 3 | GCCAAT | TACAAG  |
| CBC_MCAV_097 | 03/24/17 | TR | 16 | 22 | 3 | ACAGTG | GCGGAC  |
| CBC_MCAV_098 | 03/24/17 | TR | 16 | 24 | 3 | ACAGTG | GGCCAC  |
| CBC_MCAV_099 | 03/24/17 | TR | 16 | 24 | 1 | ATCACG | TTGACT  |
| CBC_MCAV_100 | 03/24/17 | TR | 16 | 22 | 1 | ACTTGA | GGA ACT |

|              |          |    |    |    |   |        |        |
|--------------|----------|----|----|----|---|--------|--------|
| CBC_MCAV_101 | 03/24/17 | TR | 16 | 22 | 2 | TGACCA | TACAAG |
| CBC_MCAV_102 | 03/24/17 | TR | 16 | 22 | 3 | TTAGGC | GCGGAC |
| CBC_MCAV_103 | 03/24/17 | TR | 16 | 22 | 1 | CAGATC | GGAACT |
| CBC_MCAV_104 | 03/24/17 | TR | 16 | 22 | 1 | GCCAAT | GTAGCC |
| CBC_MCAV_105 | 03/24/17 | TR | 16 | 22 | 2 | ACTTGA | GGCCAC |
| CBC_MCAV_106 | 03/24/17 | TR | 16 | 23 | 1 | ATCACG | TGACAT |
| CBC_MCAV_107 | 03/25/17 | TR | 10 | 22 | 3 | CAGATC | TGACAT |
| CBC_MCAV_108 | 03/25/17 | TR | 10 | 22 | 2 | ACAGTG | TTGACT |
| CBC_MCAV_109 | 03/25/17 | TR | 10 | 22 | 3 | CAGATC | GGACGG |
| CBC_MCAV_110 | 03/25/17 | TR | 10 | 22 | 1 | ACTTGA | TTGACT |
| CBC_MCAV_111 | 03/25/17 | TR | 10 | 23 | 3 | TGACCA | TTTCAC |
| CBC_MCAV_112 | 03/25/17 | TR | 10 | 22 | 1 | TTAGGC | TACAAG |
| CBC_MCAV_113 | 03/25/17 | TR | 10 | 22 | 2 | ATCACG | GTAGCC |
| CBC_MCAV_114 | 03/25/17 | TR | 10 | 22 | 2 | TGACCA | GGAACT |
| CBC_MCAV_115 | 03/27/17 | GR | 10 | 22 | 2 | ACAGTG | CTCTAC |
| CBC_MCAV_116 | 03/25/17 | TR | 10 | 22 | 1 | CAGATC | TTTCAC |
| CBC_MCAV_117 | 03/25/17 | TR | 10 | 22 | 1 | ACTTGA | GCGGAC |
| CBC_MCAV_118 | 03/25/17 | TR | 10 | 22 | 1 | CAGATC | GGCCAC |
| CBC_MCAV_119 | 03/25/17 | TR | 10 | 22 | 3 | ATCACG | TTGACT |
| CBC_MCAV_120 | 03/25/17 | TR | 10 | 22 | 1 | TGACCA | GGAACT |
| CBC_MCAV_121 | 03/25/17 | TR | 10 | 22 | 3 | ATCACG | GGAACT |
| CBC_MCAV_122 | 03/25/17 | TR | 25 | 22 | 2 | TTAGGC | TTGACT |
| CBC_MCAV_123 | 03/25/17 | TR | 25 | 22 | 1 | TGACCA | TACAAG |
| CBC_MCAV_124 | 03/25/17 | TR | 25 | 22 | 1 | TGACCA | GCGGAC |
| CBC_MCAV_125 | 03/25/17 | TR | 25 | 22 | 1 | TTAGGC | GCGGAC |
| CBC_MCAV_126 | 03/25/17 | TR | 25 | 22 | 2 | ACTTGA | GTAGCC |
| CBC_MCAV_127 | 03/25/17 | TR | 25 | 22 | 1 | GATCAG | GTAGCC |
| CBC_MCAV_128 | 03/25/17 | TR | 25 | 22 | 3 | CGATGT | TACAAG |
| CBC_MCAV_129 | 03/25/17 | TR | 25 | 23 | 3 | ACTTGA | TTGACT |

|              |          |    |    |    |   |        |        |
|--------------|----------|----|----|----|---|--------|--------|
| CBC_MCAV_130 | 03/25/17 | TR | 25 | 22 | 3 | ACTTGA | CTCTAC |
| CBC_MCAV_131 | 03/25/17 | TR | 25 | 22 | 2 | ATCACG | GGAACT |
| CBC_MCAV_132 | 03/25/17 | TR | 25 | 22 | 1 | TGACCA | TTTCAC |
| CBC_MCAV_133 | 03/25/17 | TR | 25 | 22 | 2 | ACTTGA | GGAACT |
| CBC_MCAV_134 | 03/25/17 | TR | 25 | 22 | 1 | CAGATC | TGACAT |
| CBC_MCAV_135 | 03/25/17 | TR | 25 | 22 | 3 | ACTTGA | GGACGG |
| CBC_MCAV_136 | 03/25/17 | TR | 25 | 22 | 3 | TGACCA | GGAACT |
| CBC_MCAV_137 | 03/27/17 | TR | 16 | 22 | 1 | CAGATC | GTAGCC |
| CBC_MCAV_138 | 03/27/17 | GR | 35 | 23 | 3 | TTAGGC | GGAACT |
| CBC_MCAV_139 | 03/27/17 | GR | 35 | 22 | 3 | ATCACG | GGACGG |
| CBC_MCAV_140 | 03/27/17 | GR | 35 | 22 | 1 | ATCACG | GGACGG |
| CBC_MCAV_141 | 03/27/17 | GR | 35 | 22 | 3 | CAGATC | TTGACT |
| CBC_MCAV_142 | 03/27/17 | GR | 35 | 22 | 2 | TGACCA | GGACGG |
| CBC_MCAV_143 | 03/27/17 | GR | 35 | 22 | 2 | CGATGT | TACAAG |
| CBC_MCAV_144 | 03/27/17 | GR | 35 | 22 | 1 | CAGATC | GCGGAC |
| CBC_MCAV_145 | 03/27/17 | GR | 25 | 22 | 3 | GCCAAT | CTCTAC |
| CBC_MCAV_146 | 03/27/17 | GR | 25 | 22 | 3 | TTAGGC | TACAAG |
| CBC_MCAV_147 | 03/27/17 | GR | 25 | 22 | 2 | TTAGGC | CTCTAC |
| CBC_MCAV_148 | 03/27/17 | GR | 16 | 22 | 1 | GCCAAT | GGACGG |
| CBC_MCAV_149 | 03/27/17 | GR | 16 | 26 | 3 | ATCACG | TACAAG |
| CBC_MCAV_150 | 03/27/17 | GR | 16 | 22 | 2 | CAGATC | TTTCAC |
| CBC_MCAV_151 | 03/27/17 | GR | 16 | 22 | 2 | CAGATC | GTAGCC |
| CBC_MCAV_152 | 03/27/17 | GR | 10 | 22 | 3 | ACAGTG | TGACAT |
| CBC_MCAV_153 | 03/27/17 | GR | 10 | 22 | 2 | GCCAAT | GTAGCC |
| CBC_MCAV_154 | 03/25/17 | GR | 10 | 22 | 1 | ACTTGA | TTTCAC |
| CBC_MCAV_155 | 03/27/17 | GR | 10 | 22 | 2 | ACAGTG | GTAGCC |
| CBC_MCAV_156 | 03/27/17 | TR | 10 | 22 | 1 | CGATGT | GCGGAC |
| CBC_MCAV_157 | 03/27/17 | GR | 10 | 24 | 2 | ATCACG | GGCCAC |
| CBC_MCAV_158 | 03/27/17 | GR | 10 | 22 | 1 | ACTTGA | TACAAG |

|              |          |    |    |    |   |        |        |
|--------------|----------|----|----|----|---|--------|--------|
| CBC_MCAV_159 | 03/27/17 | GR | 10 | 22 | 2 | ACTTGA | TACAAG |
| CBC_MCAV_160 | 03/27/17 | GR | 10 | 22 | 1 | CGATGT | GGACGG |
| CBC_MCAV_161 | 03/27/17 | GR | 10 | 22 | 2 | CGATGT | TTGACT |
| CBC_MCAV_162 | 03/27/17 | GR | 10 | 22 | 3 | TTAGGC | GTAGCC |
| CBC_MCAV_163 | 03/27/17 | GR | 10 | 22 | 3 | GCCAAT | GCGGAC |
| CBC_MCAV_164 | 03/27/17 | GR | 10 | 22 | 1 | TTAGGC | GGAACT |
| CBC_MCAV_165 | 03/27/17 | GR | 10 | 22 | 3 | ATCACG | TGACAT |
| CBC_MCAV_166 | 03/27/17 | GR | 10 | 22 | 1 | ATCACG | GGCCAC |
| CBC_MCAV_167 | 03/27/17 | GR | 25 | 22 | 2 | CGATGT | GGAACT |
| CBC_MCAV_168 | 03/27/17 | GR | 25 | 22 | 2 | TTAGGC | GGACGG |
| CBC_MCAV_169 | 03/27/17 | GR | 25 | 24 | 2 | CAGATC | CTCTAC |
| CBC_MCAV_170 | 03/27/17 | GR | 25 | 23 | 2 | ACAGTG | GGAACT |
| CBC_MCAV_171 | 03/27/17 | GR | 25 | 24 | 1 | CGATGT | GTAGCC |
| CBC_MCAV_172 | 03/27/17 | GR | 25 | 22 | 3 | CAGATC | GGCCAC |
| CBC_MCAV_173 | 03/27/17 | GR | 25 | 22 | 2 | ATCACG | GGACGG |
| CBC_MCAV_174 | 03/27/17 | GR | 25 | 22 | 2 | ACAGTG | GCGGAC |
| CBC_MCAV_175 | 03/27/17 | GR | 25 | 24 | 2 | TGACCA | GTAGCC |
| CBC_MCAV_176 | 03/27/17 | GR | 16 | 22 | 3 | CGATGT | CTCTAC |
| CBC_MCAV_177 | 03/27/17 | GR | 16 | 22 | 3 | ACTTGA | GTAGCC |
| CBC_MCAV_178 | 03/27/17 | GR | 16 | 24 | 1 | ACAGTG | GGACGG |
| CBC_MCAV_179 | 03/27/17 | GR | 16 | 23 | 1 | ACAGTG | TTGACT |
| CBC_MCAV_180 | 03/27/17 | GR | 16 | 28 | 2 | ACAGTG | GGCCAC |
| CBC_MCAV_181 | 03/27/17 | GR | 16 | 22 | 3 | TTAGGC | TTGACT |
| CBC_MCAV_182 | 03/27/17 | GR | 16 | 22 | 1 | ACTTGA | CTCTAC |
| CBC_MCAV_183 | 03/27/17 | GR | 16 | 24 | 2 | ACTTGA | CTCTAC |
| CBC_MCAV_184 | 03/27/17 | GR | 25 | 22 | 2 | TTAGGC | TACAAG |
| CBC_MCAV_185 | 03/27/17 | GR | 25 | 24 | 1 | CAGATC | TACAAG |
| CBC_MCAV_186 | 03/27/17 | GR | 25 | 24 | 2 | TTAGGC | TGACAT |
| CBC_MCAV_187 | 03/27/17 | GR | 16 | 22 | 3 | ATCACG | TTTCAC |



|              |          |    |    |    |   |        |        |
|--------------|----------|----|----|----|---|--------|--------|
| CBC_MCAV_188 | 03/27/17 | GR | 16 | 22 | 3 | TGACCA | TTGACT |
| CBC_MCAV_189 | 03/27/17 | GR | 16 | 24 | 3 | TGACCA | GGCCAC |
| CBC_MCAV_190 | 03/27/17 | GR | 35 | 23 | 2 | TGACCA | TTGACT |
| CBC_MCAV_191 | 03/27/17 | GR | 35 | 22 | 2 | CAGATC | GCGGAC |
| CBC_MCAV_192 | 03/27/17 | GR | 35 | 22 | 2 | TGACCA | TGACAT |
| CBC_MCAV_193 | 03/27/17 | GR | 35 | 22 | 2 | ACTTGA | GCGGAC |
| CBC_MCAV_194 | 03/27/17 | GR | 35 | 22 | 3 | CAGATC | TACAAG |
| CBC_MCAV_195 | 03/27/17 | GR | 35 | 22 | 3 | CGATGT | GCGGAC |
| CBC_MCAV_196 | 03/27/17 | GR | 35 | 22 | 2 | GCCAAT | GGAACT |
| CBC_MCAV_197 | 03/05/16 | GR | 35 | 22 | 1 | CGATGT | TTTCAC |
| CBC_MCAV_198 | 03/05/16 | SR | 35 | 22 | 2 | ACTTGA | TTGACT |
| CBC_MCAV_199 | 03/05/16 | SR | 35 | 24 | 3 | ATCACG | GGCCAC |
| CBC_MCAV_200 | 03/05/16 | SR | 35 | 24 | 3 | TTAGGC | GGCCAC |
| CBC_MCAV_201 | 03/05/16 | SR | 35 | 24 | 1 | GCCAAT | TGACAT |
| CBC_MCAV_202 | 03/05/16 | SR | 35 | 28 | 2 | GCCAAT | TTTCAC |
| CBC_MCAV_203 | 03/05/16 | SR | 35 | 22 | 3 | ACAGTG | GGACGG |
| CBC_MCAV_204 | 03/05/16 | SR | 35 | 22 | 2 | ACAGTG | TACAAG |
| CBC_MCAV_205 | 03/05/16 | SR | 35 | 24 | 2 | TTAGGC | TTTCAC |
| CBC_MCAV_206 | 03/05/16 | SR | 35 | 24 | 2 | ATCACG | TTGACT |
| CBC_MCAV_207 | 03/06/16 | SR | 35 | 24 | 1 | ACAGTG | GGAACT |
| CBC_MCAV_208 | 03/05/16 | SR | 35 | 24 | 2 | TGACCA | GGCCAC |
| CBC_MCAV_209 | 03/05/16 | SR | 35 | 28 | 3 | GCCAAT | GGCCAC |
| CBC_MCAV_210 | 03/05/16 | SR | 35 | 23 | 3 | TGACCA | GTAGCC |
| CBC_MCAV_211 | 03/06/16 | RW | 35 | 26 | 3 | TGACCA | TACAAG |
| CBC_MCAV_212 | 03/06/16 | RW | 35 | 28 | 3 | TTAGGC | CTCTAC |
| CBC_MCAV_213 | 03/06/16 | RW | 35 | 26 | 1 | ATCACG | GGAACT |
| CBC_MCAV_214 | 03/06/16 | RW | 35 | 24 | 2 | CGATGT | CTCTAC |
| CBC_MCAV_215 | 03/06/16 | RW | 35 | 28 | 3 | CAGATC | GGAACT |
| CBC_MCAV_216 | 03/06/16 | RW | 35 | 28 | 1 | ACAGTG | TACAAG |

|              |          |    |    |     |     |        |         |
|--------------|----------|----|----|-----|-----|--------|---------|
| CBC_MCAV_217 | 03/06/16 | RW | 35 | 28  | 1   | CGATGT | CTCTAC  |
| CBC_MCAV_218 | 03/06/16 | RW | 35 | 22  | 1   | GCCAAT | GGCCAC  |
| CBC_MCAV_219 | 03/06/16 | RW | 35 | 28  | 3   | TTAGGC | TGACAT  |
| CBC_MCAV_220 | 03/06/16 | RW | 35 | 28  | 1   | CAGATC | CTCTAC  |
| CBC_MCAV_221 | 03/06/16 | RW | 35 | 27  | 2   | GCCAAT | TTGACT  |
| CBC_MCAV_222 | 03/06/16 | RW | 35 | 28  | 1   | CGATGT | GGCCAC  |
| CBC_MCAV_223 | 03/07/16 | RW | 35 | 28  | 1   | TTAGGC | TGACAT  |
| CBC_MCAV_224 | 03/06/16 | RW | 35 | 28  | 3   | ACTTGA | TGACAT  |
| CBC_MCAV_225 | 03/06/16 | RW | 35 | 28  | 3   | ACAGTG | TTTCAC  |
| CBC_MCAV_226 | 03/07/16 | TR | 35 | 28  | 3   | TGACCA | GGACGG  |
| CBC_MCAV_227 | 03/07/16 | TR | 35 | 28  | 1   | TTAGGC | GGACGG  |
| CBC_MCAV_228 | 03/07/16 | TR | 35 | 26  | 1   | ACAGTG | TTTCAC  |
| CBC_MCAV_229 | 03/07/16 | TR | 35 | 28  | 3   | GCCAAT | GGACGG  |
| CBC_MCAV_230 | 03/07/16 | TR | 35 | 22  | 3   | ACAGTG | GGA ACT |
| CBC_MCAV_231 | 03/08/16 | TR | 35 | 28  | 1   | CAGATC | GGACGG  |
| CBC_MCAV_232 | 03/08/16 | TR | 35 | 25  | 2   | GCCAAT | GGCCAC  |
| CBC_MCAV_233 | 03/25/17 | TR | 35 | 28  | 1   | TTAGGC | TTGACT  |
| CBC_MCAV_234 | 03/08/16 | TR | 35 | 28  | 3   | ACTTGA | TTTCAC  |
| CBC_MCAV_235 | 03/08/16 | TR | 35 | N/A | N/A | N/A    | N/A     |
| CBC_MCAV_236 | 03/08/16 | TR | 35 | 24  | 2   | TTAGGC | GGA ACT |
| CBC_MCAV_237 | 03/08/16 | TR | 35 | 24  | 3   | GCCAAT | G TAGCC |
| CBC_MCAV_238 | 03/08/16 | TR | 35 | 24  | 1   | ATCACG | TACAAG  |
| CBC_MCAV_239 | 03/08/16 | TR | 35 | 24  | 2   | CAGATC | GGA ACT |
| CBC_MCAV_240 | 03/08/16 | TR | 35 | 24  | 1   | ACTTGA | G TAGCC |
| CBC_MCAV_241 | 03/08/16 | SR | 35 | 24  | 3   | CGATGT | GGA ACT |
| CBC_MCAV_242 | 03/08/16 | SR | 35 | 24  | 3   | TTAGGC | GGACGG  |

**Supplementary Table S3.** Test results from permutational multivariate analysis of variance (PERMANOVA; 9,999 permutations) of Symbiodiniaceae *ITS2* type profiles from *M. cavernosa* colonies and pairwise comparisons between all depth zones (FDR corrected) without 35 m samples. Non-significant tests are listed as “ns”.

| <b>Test</b> | <b>Comparison</b> | <b>Pseudo-<i>F</i></b> | <b><i>p</i>-value</b> |
|-------------|-------------------|------------------------|-----------------------|
| Overall     | Depth             | 5.6348                 | 0.0002                |
|             | Site              | 1.4764                 | ns                    |
|             | Depth:Site        | 1.2106                 | ns                    |
| Depth       | 10 m vs 16 m      | 0.9838                 | ns                    |
|             | 10 m vs 25 m      | 9.0844                 | 0.0006                |
|             | 16 m vs 25 m      | 9.4051                 | 0.0006                |
